# Supplementary material
Source: PubMed Central journal article supplement (PMC8613537)
Supplement: NIHMS1754432-supplement-Supplementary_Material_S2.pdf [file NIHMS1754432-supplement-Supplementary_Material_S2.pdf]

Supplementary Figures

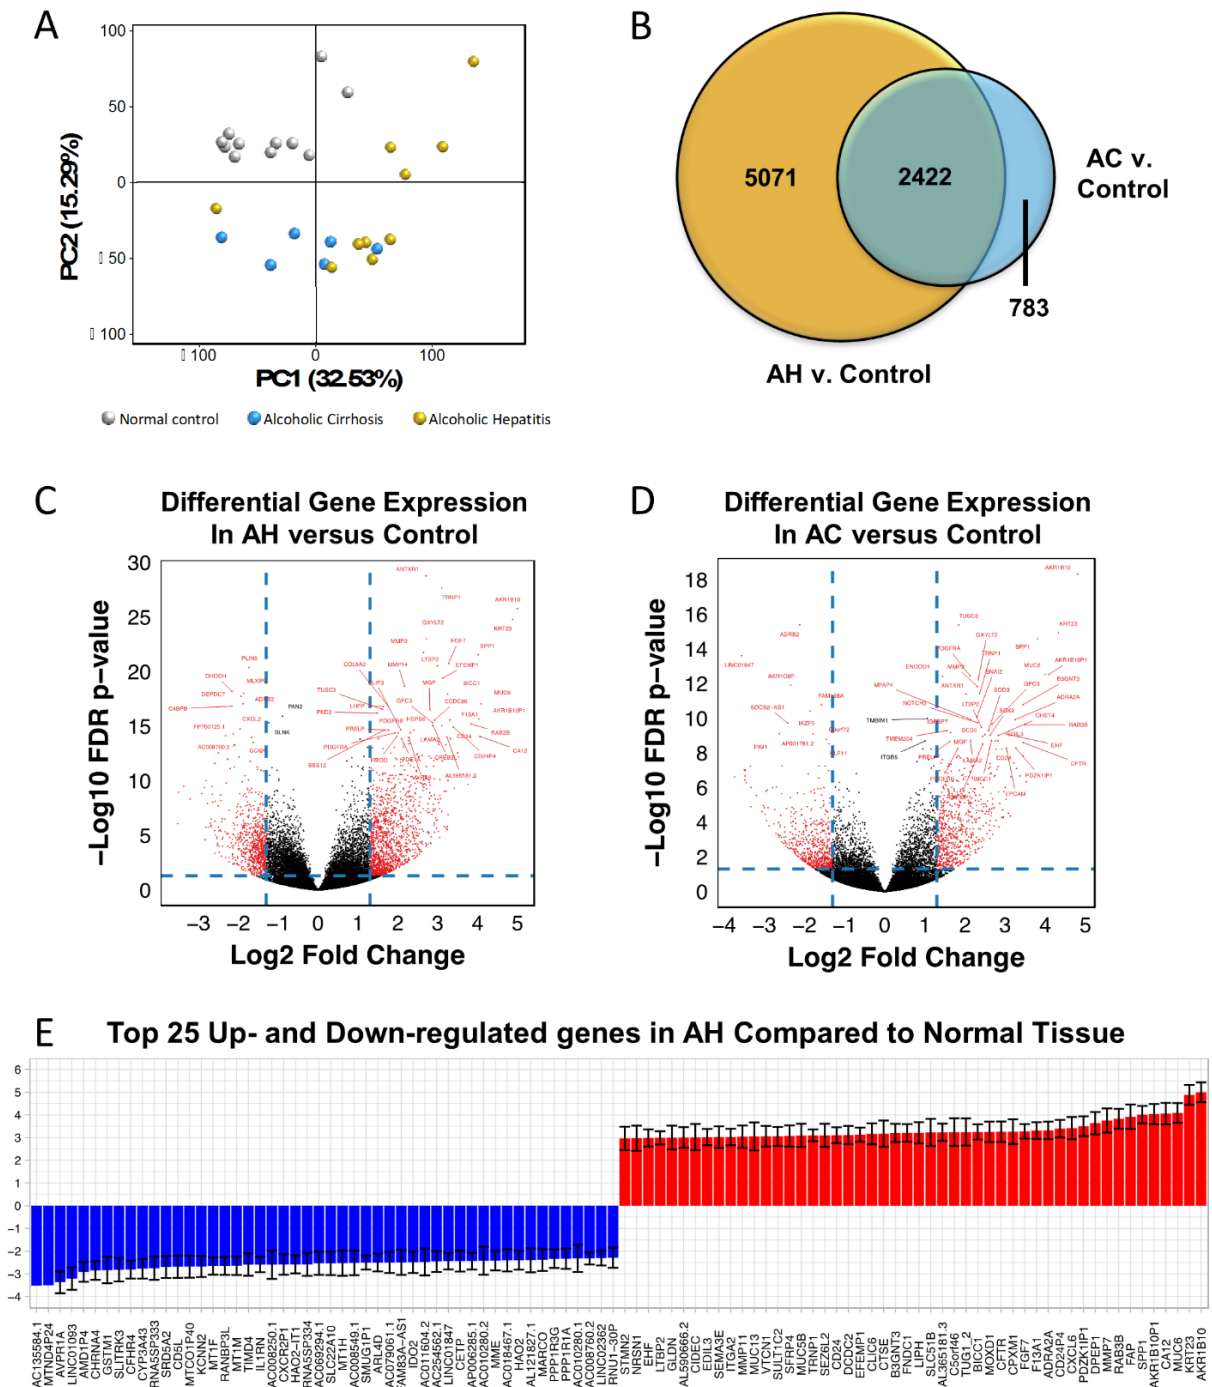

**Supplementary Figure 1.** The hepatic transcriptome is altered in alcoholic liver disease. Analysis of total RNA sequencing of human liver tissue was performed using the DESeq2 package in R as described in *Materials & Methods*. (A) Plot of the Principle Component Analysis (PCA) of the hepatic transcriptome. (B) Venn diagram showing the total number of transcripts changed in AH versus control (yellow) and alcoholic cirrhosis (AC) versus

control (blue). Overlap shows genes that were changed in both AH and AC compared to control. Volcano plots showing the differential gene expression in (C) AH compared to control tissues and (D) alcoholic cirrhosis compared to control tissues. (E) Top downregulated (blue) and 25 upregulated (red) genes in AH compared to control.

## Top 25 Up- and Down-regulated Disease Associated Pathways in AH Compared to Normal Tissue

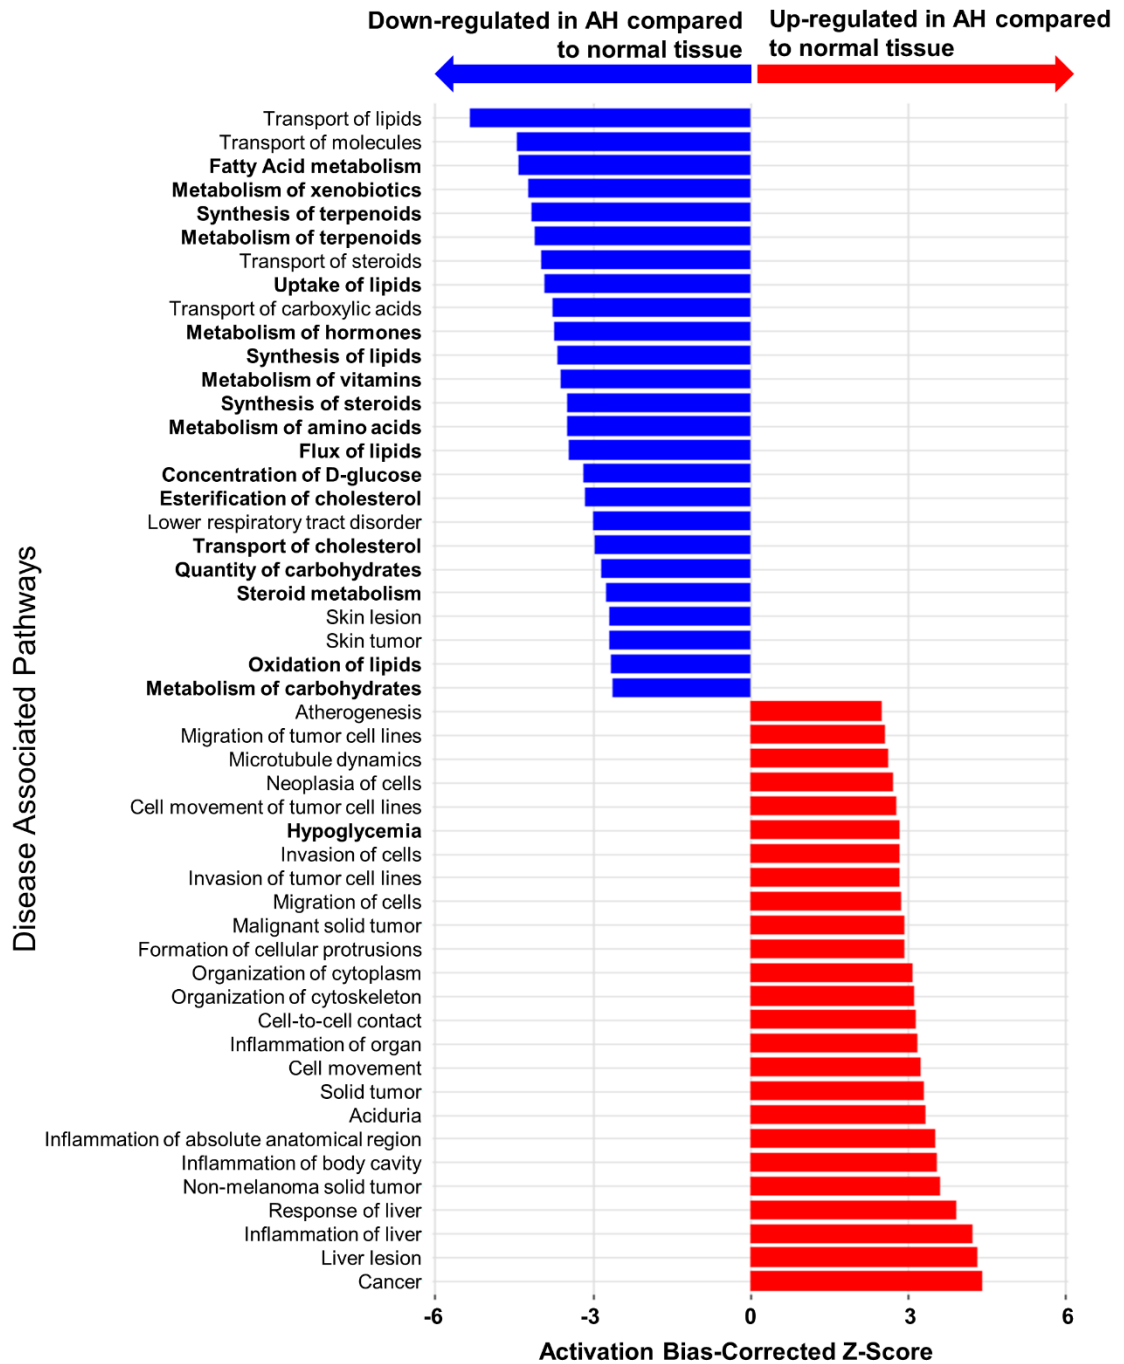

**Supplementary Figure 2. Ingenuity pathway analysis of the hepatic transcriptome of alcoholic hepatitis (AH).** Ingenuity pathway analysis was performed as described in *Materials and Methods*. The top 25 down-regulated (blue) and up-regulated (red) disease associated pathways identified in AH compared to normal tissue (control) are shown. Data are shown as activate bias-corrected Z-score.

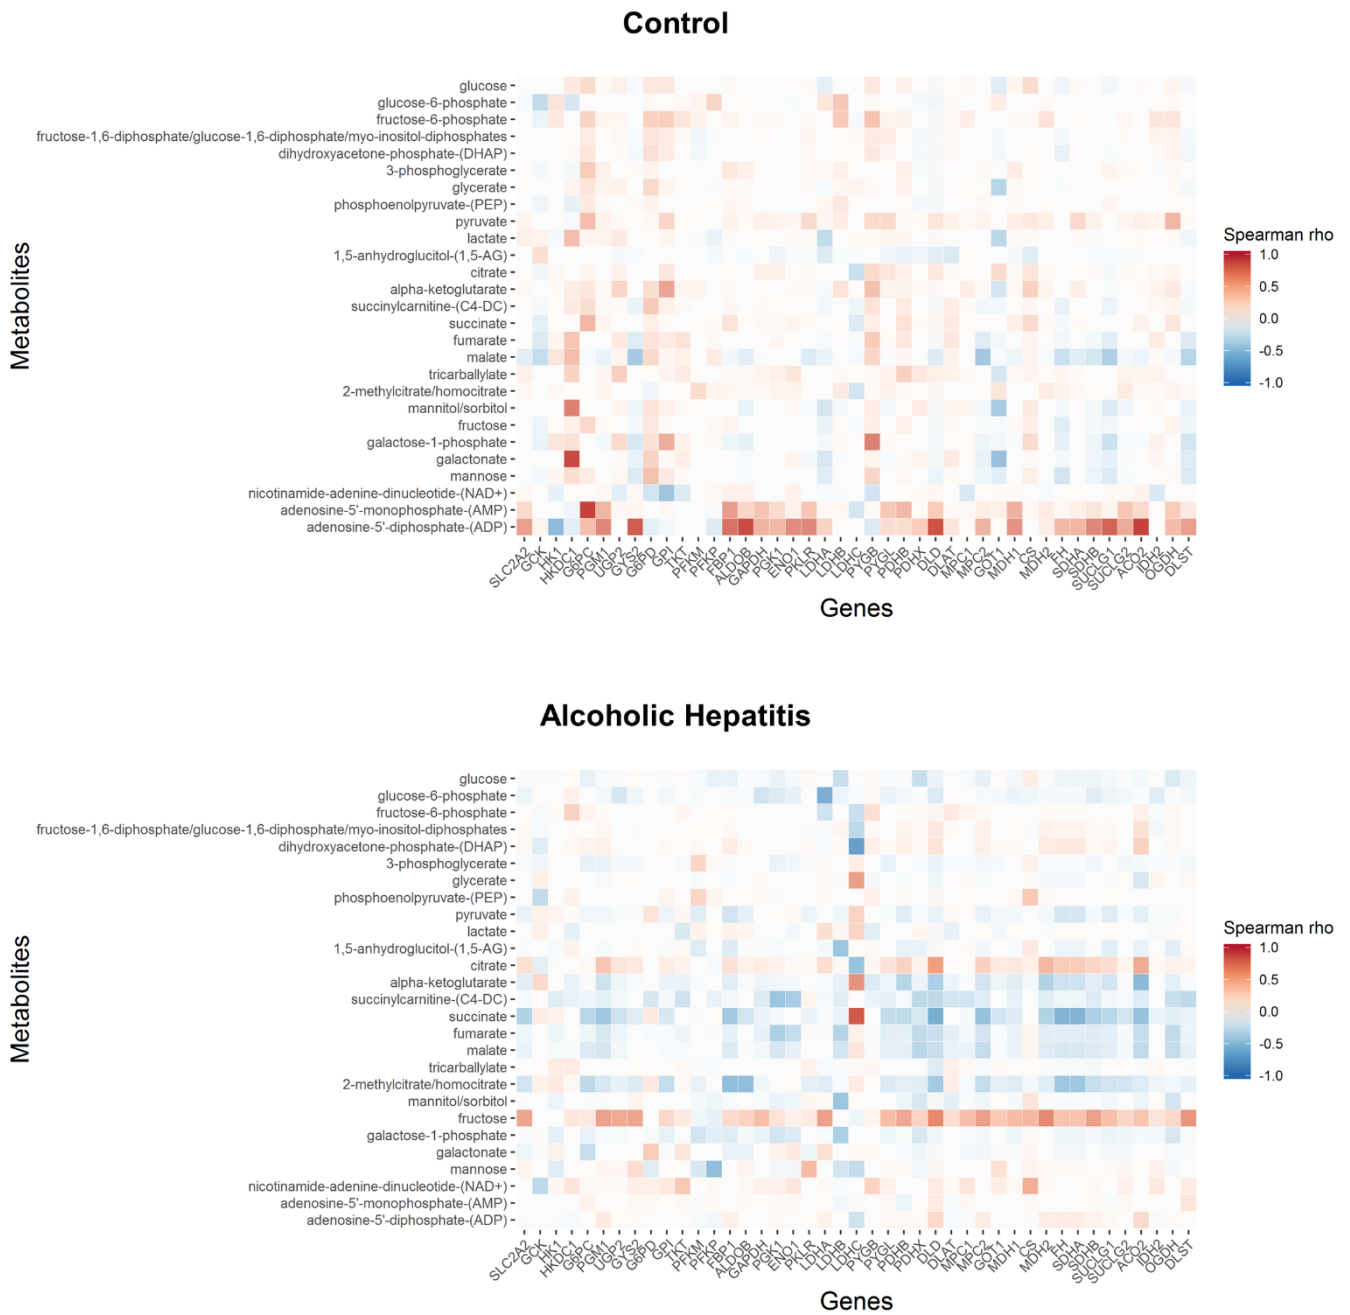

**Supplementary Figure 3.** Control patient samples (top) show differential correlations between key genes and metabolites involved in energetic processes, such as the TCA cycle, when compared with alcoholic hepatitis patient samples (bottom).

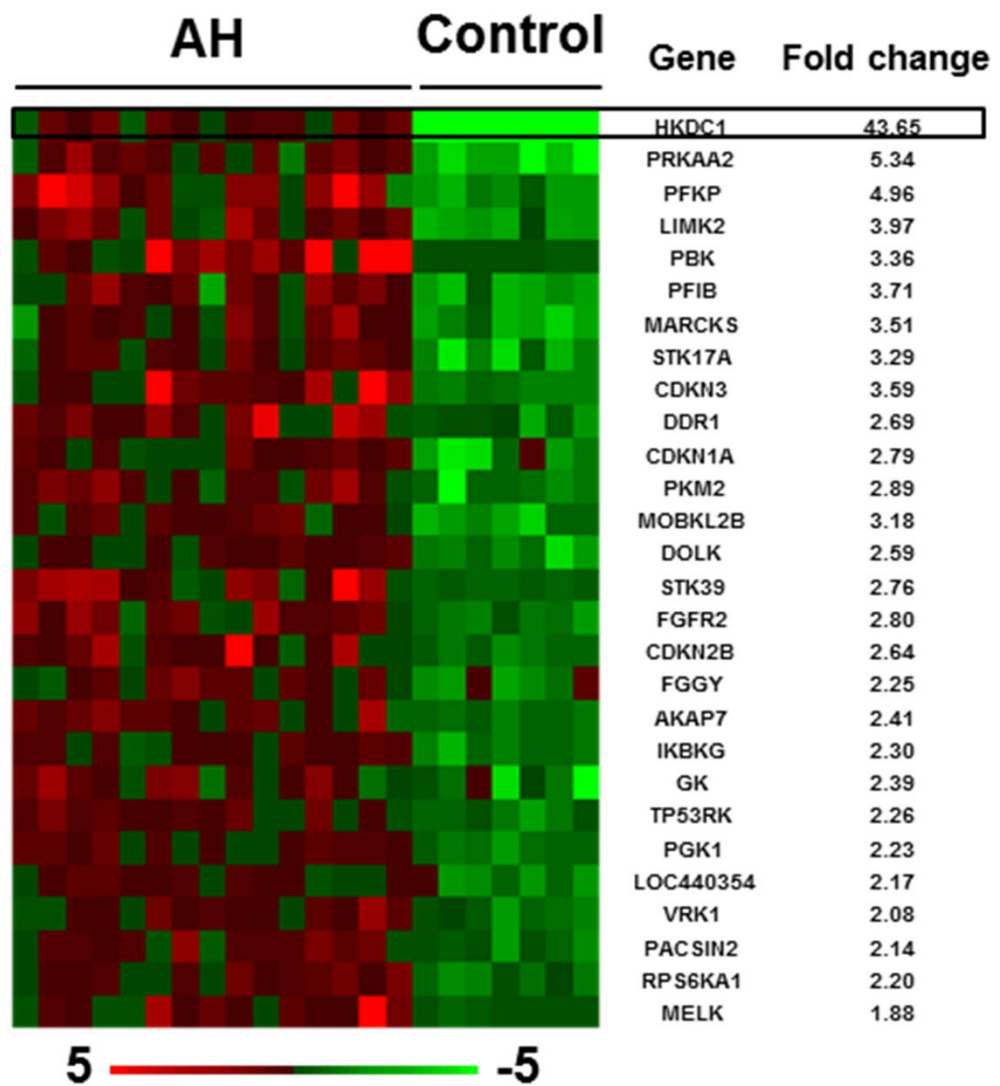

**Supplementary Figure 4.** Hepatic expression of HKDC1 is increased in alcoholic hepatitis patients. (A) Heatmap showing hierarchical clustering using expression profiles of kinases genes. Distances were measured using Pearson correlation.

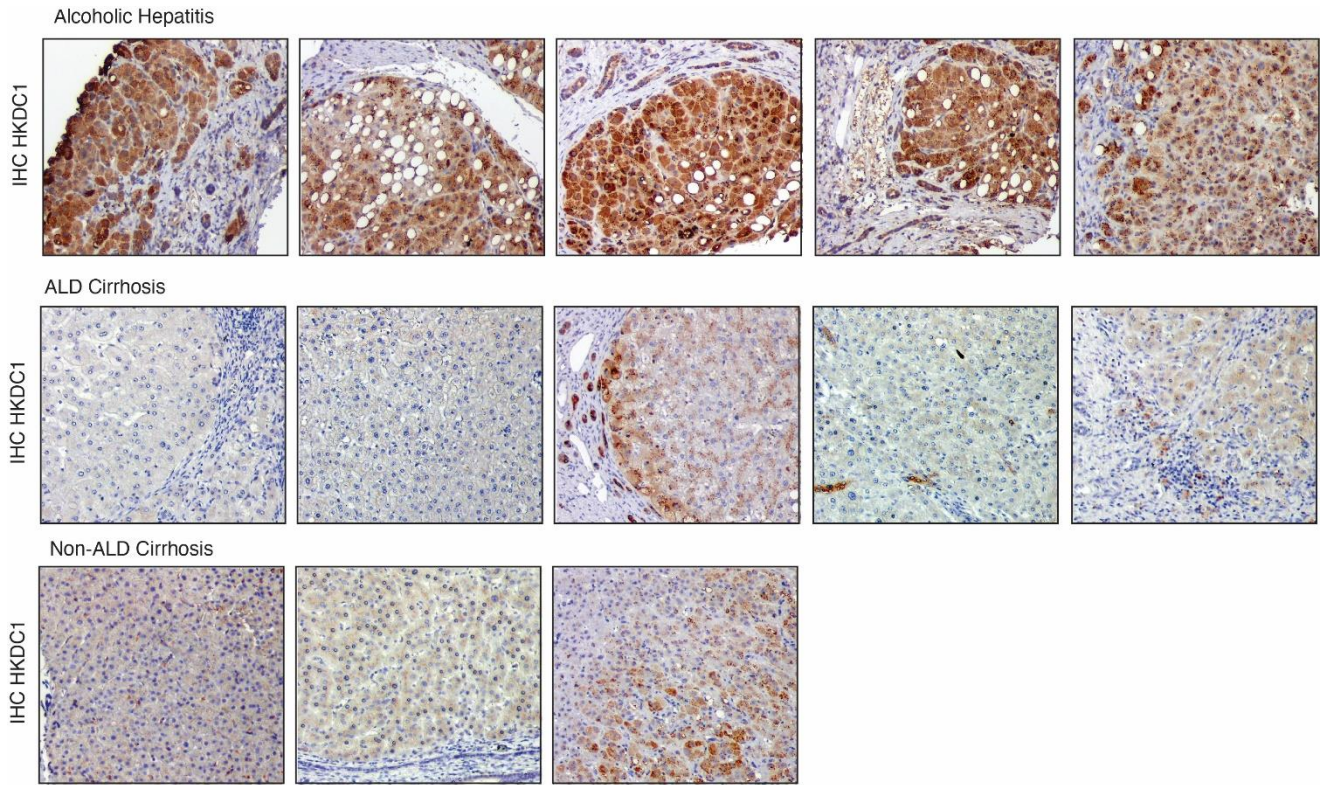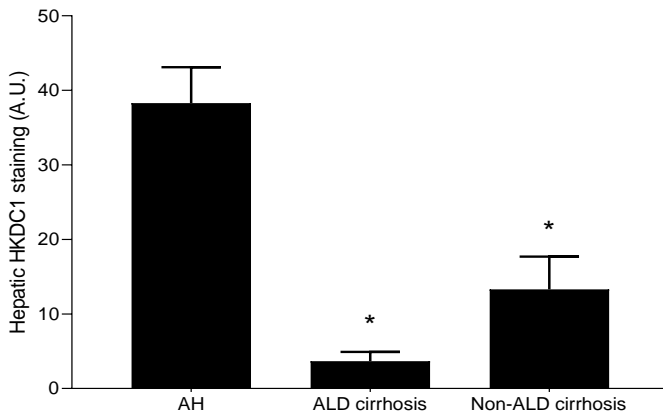

**Supplementary Figure 5.** HKDC1 expression is markedly increased in hepatocytes in alcoholic hepatitis. HKDC1 immunostaining (original magnification, 200X) in livers from patients with alcoholic hepatitis (AH), alcoholic liver disease (ALD) cirrhosis and non-ALD cirrhosis. The intensity of HKDC1 staining was quantified using ImageJ and presented in the bar chart. \* $p < 0.05$ , AH vs ALD cirrhosis and non-ALD cirrhosis. A. U.: arbitrary units.

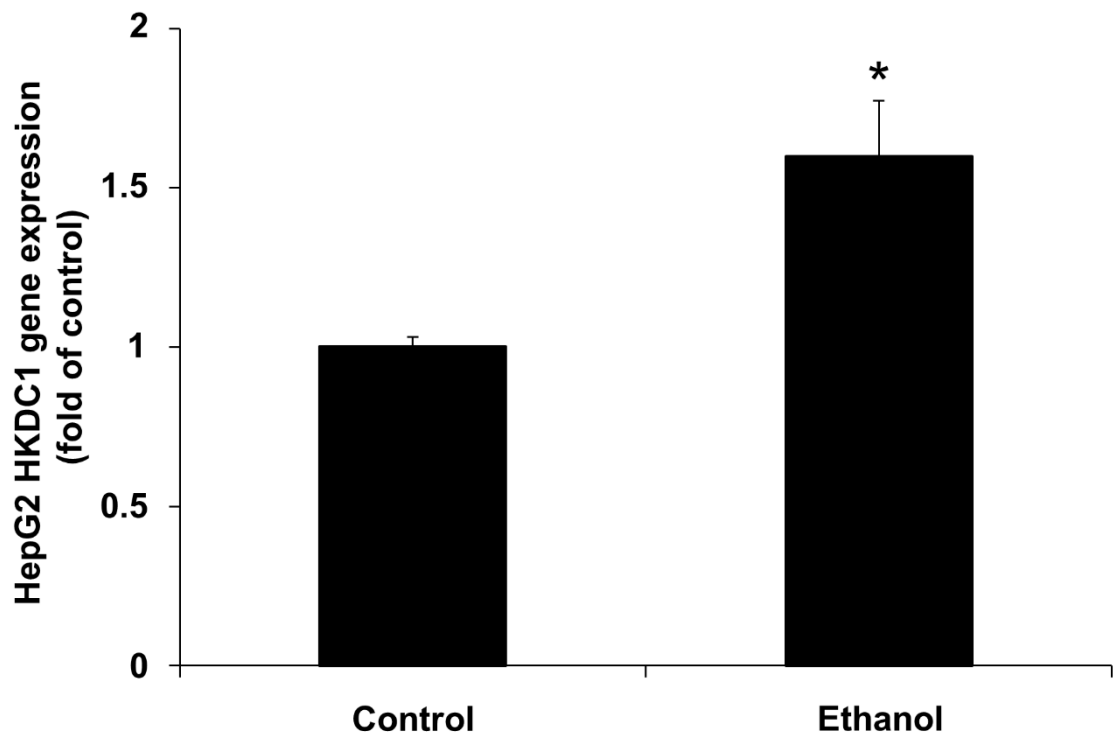

**Supplementary Figure 6.** Ethanol treatment increases HKDC1 gene expression in HepG2 cells. Cells were cultured in the presence or the absence of 15 mM ethanol for 48 hours. Data are representative of 6 different experiments. Data are shown as the mean  $\pm$  standard error. \* $p < 0.05$  compared to control.

## Supplementary Tables

|                                       | <b>Normal livers<br/>n=11</b> | <b>Cirrhosis<br/>n=10</b> | <b>AH<br/>n=10</b>    |
|---------------------------------------|-------------------------------|---------------------------|-----------------------|
| <b>Demographics</b>                   |                               |                           |                       |
| Age - median (IQR)                    | 60(55-71)                     | 51 (41.5-62)              | 58.5 (31.25-60.5)     |
| Gender - male n (%)                   | 6 (54.5)                      | 6 (60)                    | 6 (60)                |
| <b>Severity scores – median (IQR)</b> |                               |                           |                       |
| Child-Pugh                            | N/A                           | 11 (9.75-12)              | 12 (10.75-13)         |
| MELD                                  | N/A                           | 25 (23.5-29.5)            | 29.5 (24.87-35)       |
| ABIC                                  | N/A                           | N/A                       | 8.68 (7.44-10.21)     |
| Maddrey                               | N/A                           | N/A                       | 66.66 (50.4-92.1)     |
| Lille                                 | N/A                           | N/A                       | 0.83 (0.71-0.9)       |
| Lille response n (%)                  | N/A                           | N/A                       | 1(10)                 |
| <b>Lab parameters - median (IQR)</b>  |                               |                           |                       |
| Hemoglobin g/dL                       | 13.5 (12.7-14.15)             | 8.2 (7.6-11.6)            | 9.2 (8.9-11.7)        |
| WBC x10 <sup>9</sup> /L               | 6.19 (4.97-8.74)              | 6.68 (5.30-8.81)          | 13.25 (7.02-18.22)    |
| Platelets x10 <sup>9</sup> /L         | 153 (135-398.5)               | 92 (62.5-134.5)           | 115 (97-161)          |
| AST (U/L)                             | 30 (29-38.5)                  | 71 (41.5-79)              | 113.5 (91.75-152.5)   |
| ALT (U/L)                             | 27 (20-34)                    | 35 (19.5-43)              | 41 (26.5-67)          |
| Bilirubin mg/dL                       | 0.6 (0.3-0.8)                 | 7.55 (3.22-11.12)         | 16.5 (10.22-27.92)    |
| GGT (U/L)                             | 95 (59.5-249.5)               | 21 (16-51.5)              | 101 (53-367)          |
| ALP (U/L)                             | 163 (84.5-177)                | 127 (102-195)             | 218 (114-260)         |
| Albumin (g/dL)                        | 4 (3.8-4.55)                  | 3.05 (2.42-3.92)          | 2.5 (2.4-2.65)        |
| Creatinine mg/dL                      | 0.89 (0.7-1.04)               | 0.9 (0.67-1.21)           | 0.8 (0.6-1.4)         |
| Sodium (mEq/L)                        | 137 (136-138.5)               | 134 (125-137)             | 124.5 (119.25-126.75) |
| INR                                   | 1.1 (1-1.15)                  | 1.65 (1.39-2.37)          | 2.05 (1.73-3.5)       |
| PT (Quick Index, %)                   | 98 (86-100)                   | 40.5 (34.25-56.75)        | 34.5 (23.5-43.5)      |

**Supplementary Table 1.** Baseline characteristics of patients and controls.

HVPG: Hepatic Venous Pressure Gradient; GI: Gastro Intestinal; SIRS: Systemic Inflammatory Response Syndrome; WBC: White blood count; AST: Aspartate aminotransferase; ALT: Alanine aminotransferase; GGT: Gamma Glutamyl Transpeptidase; ALP: Alkaline Phosphatase; INR: International Normalized Ratio; PT: Prothrombin Time



**Supplementary Table 2. Metabolites uniquely changed in alcoholic hepatitis compared to control**

| Biochemical Name                                   | Super Pathway          | Sub Pathway                                          | AH vs AC |         | AH vs Control |         | AC vs Control |         |
|----------------------------------------------------|------------------------|------------------------------------------------------|----------|---------|---------------|---------|---------------|---------|
|                                                    |                        |                                                      | FC       | P value | FC            | P value | FC            | P value |
| betaine                                            | Amino Acid             | Glycine, Serine and Threonine Metabolism             | 1.61     | 0.0006  | 1.23          | 0.0747  | 1.31          | 0.1072  |
| N-acetylthreonine                                  | Amino Acid             | Glycine, Serine and Threonine Metabolism             | 1.31     | 0.0444  | 0.92          | 0.8941  | 1.42          | 0.0874  |
| N-acetylglutamate                                  | Amino Acid             | Glutamate Metabolism                                 | 1.22     | 0.0269  | 0.96          | 0.1541  | 1.28          | 0.4869  |
| pyroglutamine*                                     | Amino Acid             | Glutamate Metabolism                                 | 0.47     | 0.0106  | 0.89          | 0.4502  | 0.53          | 0.0952  |
| N-acetylhistidine                                  | Amino Acid             | Histidine Metabolism                                 | 0.51     | 0.0034  | 0.72          | 0.2095  | 0.71          | 0.1127  |
| trans-urocanate                                    | Amino Acid             | Histidine Metabolism                                 | 19.35    | 0.0420  | 0.96          | 0.9556  | 20.12         | 0.0577  |
| 2-aminoadipate                                     | Amino Acid             | Lysine Metabolism                                    | 2.81     | 0.0067  | 1.24          | 0.3214  | 2.28          | 0.1075  |
| isovalerylcarnitine (C5)                           | Amino Acid             | Leucine, Isoleucine and Valine Metabolism            | 0.11     | 0.0045  | 0.19          | 0.0578  | 0.61          | 0.3851  |
| 2-hydroxy-3-methylvalerate                         | Amino Acid             | Leucine, Isoleucine and Valine Metabolism            | 1.67     | 0.0061  | 1.52          | 0.0730  | 1.10          | 0.3844  |
| cystine                                            | Amino Acid             | Methionine, Cysteine, SAM and Taurine Metabolism     | 1.59     | 0.0141  | 1.61          | 0.1019  | 0.99          | 0.4661  |
| N-acetylcitrulline                                 | Amino Acid             | Urea cycle; Arginine and Proline Metabolism          | 1.79     | 0.0190  | 1.58          | 0.0734  | 1.13          | 0.6433  |
| acisoga                                            | Amino Acid             | Polyamine Metabolism                                 | 0.74     | 0.0451  | 0.87          | 0.3674  | 0.85          | 0.3193  |
| glutathione, oxidized (GSSG)                       | Amino Acid             | Glutathione Metabolism                               | 0.05     | 0.0017  | 1.40          | 0.0555  | 0.04          | 0.2433  |
| 5-methylglutathione                                | Amino Acid             | Glutathione Metabolism                               | 0.09     | 0.0050  | 2.52          | 0.1782  | 0.04          | 0.1698  |
| cysteinyglycine                                    | Amino Acid             | Glutathione Metabolism                               | 0.58     | 0.0336  | 0.76          | 0.3192  | 0.77          | 0.3061  |
| 5-oxoproline                                       | Amino Acid             | Glutathione Metabolism                               | 0.56     | 0.0031  | 0.72          | 0.2075  | 0.78          | 0.1071  |
| gamma-glutamylalanine                              | Peptide                | Gamma-glutamyl Amino Acid                            | 0.39     | 0.0006  | 0.59          | 0.0570  | 0.66          | 0.1324  |
| gamma-glutamylhistidine                            | Peptide                | Gamma-glutamyl Amino Acid                            | 0.59     | 0.0146  | 0.65          | 0.0852  | 0.90          | 0.5274  |
| Ac-Ser-Asp-Lys-Pro-OH                              | Peptide                | Polypeptide                                          | 1.74     | 0.0022  | 1.28          | 0.0500  | 1.36          | 0.2997  |
| 1,5-anhydroglucitol (1,5-AG)                       | Carbohydrate           | Glycolysis, Gluconeogenesis, and Pyruvate Metabolism | 0.63     | 0.0472  | 0.66          | 0.2312  | 0.96          | 0.4887  |
| pyruvate                                           | Carbohydrate           | Glycolysis, Gluconeogenesis, and Pyruvate Metabolism | 1.96     | 0.0070  | 1.58          | 0.1295  | 1.24          | 0.2721  |
| lactate                                            | Carbohydrate           | Glycolysis, Gluconeogenesis, and Pyruvate Metabolism | 1.18     | 0.0078  | 1.09          | 0.1342  | 1.09          | 0.2813  |
| UDP-glucose                                        | Carbohydrate           | Nucleotide Sugar                                     | 0.21     | 0.0281  | 0.33          | 0.1849  | 0.64          | 0.4381  |
| acetylphosphate                                    | Energy                 | Oxidative Phosphorylation                            | 0.60     | 0.0008  | 0.77          | 0.0747  | 0.78          | 0.1270  |
| 3-hydroxybutyryl CoA                               | Lipid                  | Fatty Acid Metabolism                                | 0.35     | 0.0230  | 0.73          | 0.6184  | 0.48          | 0.1033  |
| 5-dodecenolate (12:1n7)                            | Lipid                  | Medium Chain Fatty Acid                              | 1.69     | 0.0206  | 1.82          | 0.0736  | 0.93          | 0.6654  |
| 2-hydroxyadipate                                   | Lipid                  | Fatty Acid, Dicarboxylate                            | 2.34     | 0.0233  | 1.58          | 0.0845  | 1.49          | 0.6530  |
| 3-hydroxybutyrylcarnitine (2)                      | Lipid                  | Fatty Acid Metabolism(Acyl Carnitine)                | 1.79     | 0.0077  | 1.26          | 0.1123  | 1.43          | 0.3201  |
| adipoylcarnitine (C6-DC)                           | Lipid                  | Fatty Acid Metabolism(Acyl Carnitine)                | 0.45     | 0.0075  | 0.83          | 0.5691  | 0.54          | 0.0508  |
| arachidonoylcarnitine (C20:4)                      | Lipid                  | Fatty Acid Metabolism(Acyl Carnitine)                | 3.86     | 0.0004  | 1.91          | 0.0756  | 2.02          | 0.0840  |
| docosahexaenoylcarnitine (C22:6)*                  | Lipid                  | Fatty Acid Metabolism(Acyl Carnitine)                | 2.05     | 0.0485  | 1.11          | 0.4731  | 1.84          | 0.2542  |
| 4-hydroxybutyrate (GHB)                            | Lipid                  | Fatty Acid, Monohydroxy                              | 1.84     | 0.0020  | 1.28          | 0.1037  | 1.44          | 0.1622  |
| glycerophosphoinositol*                            | Lipid                  | Phospholipid Metabolism                              | 0.63     | 0.0476  | 0.90          | 0.6327  | 0.70          | 0.1707  |
| 1-palmitoyl-2-stearoyl-GPC (16:0/18:0)             | Lipid                  | Phosphatidylcholine (PC)                             | 1.37     | 0.0021  | 1.12          | 0.2581  | 1.22          | 0.0646  |
| 1-palmitoyl-2-oleoyl-GPG (16:0/18:1)               | Lipid                  | Phosphatidylglycerol (PG)                            | 0.71     | 0.0034  | 0.90          | 0.3015  | 0.80          | 0.0740  |
| 1-palmitoyl-2-arachidonoyl-GPI (16:0/20:4)*        | Lipid                  | Phosphatidylinositol (PI)                            | 0.61     | 0.0015  | 0.84          | 0.1419  | 0.74          | 0.1003  |
| 2-palmitoleoyl-GPC (16:1)*                         | Lipid                  | Lysophospholipid                                     | 2.06     | 0.0153  | 2.00          | 0.1075  | 1.03          | 0.4683  |
| 1-palmitoyl-GPS (16:0)*                            | Lipid                  | Lysophospholipid                                     | 0.37     | 0.0162  | 0.53          | 0.1241  | 0.69          | 0.4383  |
| 1-{1-eryl-palmitoyl}-2-palmitoyl-GPC (P-16:0/16:0) | Lipid                  | Plasmalogen                                          | 1.40     | 0.0027  | 1.22          | 0.1191  | 1.15          | 0.1702  |
| pregnen-diol disulfate C21H34O8S2*                 | Lipid                  | Progesterin Steroids                                 | 0.45     | 0.0272  | 0.59          | 0.1783  | 0.76          | 0.4424  |
| glycolithocholate sulfate*                         | Lipid                  | Secondary Bile Acid Metabolism                       | 0.43     | 0.0047  | 0.73          | 0.0610  | 0.58          | 0.3800  |
| glycocholenate sulfate*                            | Lipid                  | Secondary Bile Acid Metabolism                       | 0.55     | 0.0125  | 0.71          | 0.2117  | 0.77          | 0.2493  |
| allantoin                                          | Nucleotide             | Purine Metabolism, (Hypo)Xanthine/Inosine containing | 0.42     | 0.0019  | 0.65          | 0.1509  | 0.64          | 0.1080  |
| uracil                                             | Nucleotide             | Pyrimidine Metabolism, Uracil containing             | 1.39     | 0.0182  | 1.16          | 0.1557  | 1.20          | 0.3959  |
| ascorbate (Vitamin C)                              | Cofactors and Vitamins | Ascorbate and Aldarate Metabolism                    | 1.61     | 0.0271  | 1.37          | 0.1226  | 1.18          | 0.5660  |
| 5-methyltetrahydrofolate (5MeTHF)                  | Cofactors and Vitamins | Folate Metabolism                                    | 0.42     | 0.0332  | 0.49          | 0.1052  | 0.84          | 0.6767  |
| protoporphyrin IX                                  | Cofactors and Vitamins | Hemoglobin and Porphyrin Metabolism                  | 0.36     | 0.0029  | 0.62          | 0.1424  | 0.58          | 0.1489  |
| retinol (Vitamin A)                                | Cofactors and Vitamins | Vitamin A Metabolism                                 | 0.45     | 0.0129  | 0.82          | 0.4046  | 0.55          | 0.1256  |
| 3-hydroxyhippurate                                 | Xenobiotics            | Benzoate Metabolism                                  | 0.26     | 0.0245  | 0.48          | 0.3088  | 0.54          | 0.2607  |
| 4-hydroxyhippurate                                 | Xenobiotics            | Benzoate Metabolism                                  | 0.80     | 0.0253  | 0.53          | 0.1022  | 1.50          | 0.6094  |
| 1,7-dimethylurate                                  | Xenobiotics            | Xanthine Metabolism                                  | 0.14     | 0.0010  | 0.44          | 0.0925  | 0.31          | 0.1141  |
| retinal                                            | Xenobiotics            | Food Component/Plant                                 | 0.13     | 0.0004  | 0.43          | 0.0538  | 0.31          | 0.1004  |
| beta-cryptoxanthin                                 | Xenobiotics            | Food Component/Plant                                 | 0.28     | 0.0048  | 0.41          | 0.1008  | 0.69          | 0.2690  |
| 2-ketogluconate                                    | Xenobiotics            | Food Component/Plant                                 | 0.28     | 0.0021  | 0.69          | 0.1245  | 0.41          | 0.1396  |
| carotene diol (3)                                  | Xenobiotics            | Food Component/Plant                                 | 0.38     | 0.0038  | 0.57          | 0.0828  | 0.68          | 0.2777  |
| tramadol                                           | Xenobiotics            | Drug                                                 | 142.03   | 0.0286  | 12.28         | 0.2023  | 11.56         | 0.4131  |
| O-desmethytramadol                                 | Xenobiotics            | Drug                                                 | 33.84    | 0.0290  | 4.23          | 0.1918  | 7.99          | 0.4338  |
| lanthionine                                        | Xenobiotics            | Chemical                                             | 0.63     | 0.0209  | 0.83          | 0.4473  | 0.76          | 0.1541  |

**Supplementary Table 3. Metabolites uniquely changed in alcoholic hepatitis compared to alcoholic cirrhosis**

| Biochemical Name                              | Super Pathway          | Sub Pathway                                      | AH vs AC |         | AH vs Control |         | AC vs Control |         |
|-----------------------------------------------|------------------------|--------------------------------------------------|----------|---------|---------------|---------|---------------|---------|
|                                               |                        |                                                  | FC       | P value | FC            | P value | FC            | P value |
| 1-methylimidazoleacetate                      | Amino Acid             | Histidine Metabolism                             | 0.89     | 0.3485  | 1.42          | 0.1251  | 0.63          | 0.0242  |
| 4-hydroxyphenylpyruvate                       | Amino Acid             | Tyrosine Metabolism                              | 1.11     | 0.3299  | 0.51          | 0.1127  | 2.17          | 0.0197  |
| cysteamine                                    | Amino Acid             | Methionine, Cysteine, SAM and Taurine Metabolism | 1.57     | 0.0829  | 0.91          | 0.5525  | 1.72          | 0.0356  |
| cyano-alanine                                 | Amino Acid             | Methionine, Cysteine, SAM and Taurine Metabolism | 0.74     | 0.1686  | 2.11          | 0.0551  | 0.35          | 0.0032  |
| proline                                       | Amino Acid             | Urea cycle; Arginine and Proline Metabolism      | 1.02     | 0.6523  | 0.86          | 0.0614  | 1.20          | 0.0306  |
| tryptophylglycine                             | Peptide                | Dipeptide                                        | 1.39     | 0.1564  | 0.40          | 0.0621  | 3.46          | 0.0034  |
| maltose                                       | Carbohydrate           | Glycogen Metabolism                              | 0.84     | 0.6369  | 0.33          | 0.0809  | 2.53          | 0.0391  |
| palmitoleate (16:1n7)                         | Lipid                  | Long Chain Fatty Acid                            | 1.39     | 0.2155  | 0.91          | 0.2100  | 1.53          | 0.0242  |
| adrenate (22:4n6)                             | Lipid                  | Polyunsaturated Fatty Acid (n3 and n6)           | 1.51     | 0.1020  | 0.82          | 0.2290  | 1.85          | 0.0110  |
| 2-hydroxybehenate                             | Lipid                  | Fatty Acid, Monohydroxy                          | 1.12     | 0.5043  | 0.64          | 0.0914  | 1.76          | 0.0299  |
| 1-palmitoyl-2-oleoyl-GPE (16:0/18:1)          | Lipid                  | Phosphatidylethanolamine (PE)                    | 0.95     | 0.5417  | 1.17          | 0.0545  | 0.81          | 0.0193  |
| 1-linoleoyl-2-arachidonoyl-GPE (18:2/20:4)*   | Lipid                  | Phosphatidylethanolamine (PE)                    | 0.78     | 0.0647  | 1.17          | 0.2188  | 0.67          | 0.0061  |
| 1-stearoyl-2-oleoyl-GPI (18:0/18:1)*          | Lipid                  | Phosphatidylinositol (PI)                        | 0.80     | 0.0576  | 1.30          | 0.1038  | 0.61          | 0.0019  |
| 2-myristoylglycerol (14:0)                    | Lipid                  | Monoacylglycerol                                 | 0.99     | 0.4355  | 0.55          | 0.0618  | 1.81          | 0.0153  |
| palmitoleoyl-oleoyl-glycerol (16:1/18:1) [1]* | Lipid                  | Diacylglycerol                                   | 1.89     | 0.4488  | 1.12          | 0.1373  | 1.68          | 0.0392  |
| sphingomyelin (d18:2/24:2)*                   | Lipid                  | Sphingolipid Metabolism                          | 1.14     | 0.3969  | 0.74          | 0.0665  | 1.54          | 0.0142  |
| sphingomyelin (d18:0/20:0, d16:0/22:0)*       | Lipid                  | Sphingolipid Metabolism                          | 0.94     | 0.2980  | 1.61          | 0.0662  | 0.58          | 0.0091  |
| sphingomyelin (d18:0/18:0, d19:0/17:0)*       | Lipid                  | Sphingolipid Metabolism                          | 0.82     | 0.1708  | 1.38          | 0.2439  | 0.60          | 0.0222  |
| N-stearoyl-sphinganine (d18:0/18:0)*          | Lipid                  | Sphingolipid Metabolism                          | 1.00     | 0.7935  | 1.58          | 0.0677  | 0.63          | 0.0494  |
| adenosine 3'-monophosphate (3'-AMP)           | Nucleotide             | Purine Metabolism, Adenine containing            | 0.74     | 0.0875  | 1.26          | 0.2011  | 0.58          | 0.0077  |
| N1-methylguanosine                            | Nucleotide             | Purine Metabolism, Guanine containing            | 1.43     | 0.0706  | 0.80          | 0.0813  | 1.78          | 0.0017  |
| pyridoxal phosphate                           | Cofactors and Vitamins | Vitamin B6 Metabolism                            | 0.67     | 0.1450  | 1.31          | 0.1551  | 0.51          | 0.0098  |

**Supplementary Table 4.** Metabolites uniquely changed in alcoholic cirrhosis compared to control

| Biochemical Name                             | Super Pathway          | Sub Pathway                                      | AH vs AC |         | AH vs Control |         | AC vs Control |         |
|----------------------------------------------|------------------------|--------------------------------------------------|----------|---------|---------------|---------|---------------|---------|
|                                              |                        |                                                  | FC       | P value | FC            | P value | FC            | P value |
| N-acetylglycine                              | Amino Acid             | Glycine, Serine and Threonine Metabolism         | 0.96     | 0.8899  | 0.72          | 0.0441  | 1.32          | 0.0704  |
| carboxethyl-GABA                             | Amino Acid             | Glutamate Metabolism                             | 1.13     | 0.3782  | 1.29          | 0.0327  | 0.87          | 0.1972  |
| 3-methylglutaconate                          | Amino Acid             | Leucine, Isoleucine and Valine Metabolism        | 0.74     | 0.3629  | 0.48          | 0.0346  | 1.54          | 0.2145  |
| 2-methylbutyrylcarnitine (C5)                | Amino Acid             | Leucine, Isoleucine and Valine Metabolism        | 1.43     | 0.1122  | 1.76          | 0.0140  | 0.81          | 0.3269  |
| N-acetylvaline                               | Amino Acid             | Leucine, Isoleucine and Valine Metabolism        | 0.62     | 0.1581  | 0.37          | 0.0056  | 1.69          | 0.1394  |
| N-acetylcysteine                             | Amino Acid             | Methionine, Cysteine, SAM and Taurine Metabolism | 0.78     | 0.0976  | 0.63          | 0.0145  | 1.24          | 0.3669  |
| 2-oxoarginine*                               | Amino Acid             | Urea cycle; Arginine and Proline Metabolism      | 1.35     | 0.4018  | 2.47          | 0.0267  | 0.55          | 0.1588  |
| N-acetylarginine                             | Amino Acid             | Urea cycle; Arginine and Proline Metabolism      | 1.39     | 0.0622  | 2.21          | 0.0025  | 0.63          | 0.1814  |
| N-methylproline                              | Amino Acid             | Urea cycle; Arginine and Proline Metabolism      | 1.35     | 0.2289  | 2.86          | 0.0148  | 0.47          | 0.1888  |
| guanidinoacetate                             | Amino Acid             | Creatine Metabolism                              | 0.78     | 0.3436  | 0.58          | 0.0154  | 1.34          | 0.1270  |
| gamma-glutamylleucine                        | Peptide                | Gamma-glutamyl Amino Acid                        | 0.83     | 0.6388  | 0.55          | 0.0179  | 1.52          | 0.0602  |
| gamma-glutamylthreonine                      | Peptide                | Gamma-glutamyl Amino Acid                        | 0.78     | 0.2457  | 0.64          | 0.0285  | 1.22          | 0.2738  |
| gamma-glutamylvaline                         | Peptide                | Gamma-glutamyl Amino Acid                        | 0.69     | 0.2007  | 0.50          | 0.0085  | 1.37          | 0.1471  |
| anserine                                     | Peptide                | Dipeptide Derivative                             | 1.42     | 0.1409  | 2.69          | 0.0080  | 0.53          | 0.1952  |
| UDP-galactose                                | Carbohydrate           | Nucleotide Sugar                                 | 0.81     | 0.2453  | 1.44          | 0.0492  | 0.56          | 0.3875  |
| N-acetylglucosamine/N-acetylgalactosamine    | Carbohydrate           | Aminosugar Metabolism                            | 0.68     | 0.0589  | 0.71          | 0.0374  | 0.96          | 0.7680  |
| myristate (14:0)                             | Lipid                  | Long Chain Fatty Acid                            | 0.69     | 0.3464  | 0.72          | 0.0421  | 0.97          | 0.2580  |
| 10-heptadecenoate (17:1n7)                   | Lipid                  | Long Chain Fatty Acid                            | 0.70     | 0.2617  | 0.56          | 0.0037  | 1.25          | 0.0611  |
| nonadecanoate (19:0)                         | Lipid                  | Long Chain Fatty Acid                            | 0.81     | 0.1084  | 0.69          | 0.0047  | 1.18          | 0.1722  |
| docosahexaenoate (DHA; 22:6n3)               | Lipid                  | Polyunsaturated Fatty Acid (n3 and n6)           | 0.50     | 0.0560  | 0.36          | 0.0017  | 1.39          | 0.1518  |
| 15-methylpalmitate                           | Lipid                  | Fatty Acid, Branched                             | 0.68     | 0.1855  | 0.73          | 0.0158  | 0.93          | 0.2385  |
| ximenoylcarnitine (C26:1)*                   | Lipid                  | Fatty Acid Metabolism(Acyl Carnitine)            | 0.76     | 0.1300  | 0.70          | 0.0274  | 1.07          | 0.4323  |
| oleoyl ethanolamide                          | Lipid                  | Endocannabinoid                                  | 0.68     | 0.1075  | 0.63          | 0.0446  | 1.08          | 0.6252  |
| inositol 1-phosphate (1IP)                   | Lipid                  | Inositol Metabolism                              | 0.70     | 0.0637  | 0.53          | 0.0006  | 1.32          | 0.0726  |
| 1-palmitoleoyl-GPC (16:1)*                   | Lipid                  | Lysophospholipid                                 | 0.71     | 0.0996  | 0.59          | 0.0175  | 1.21          | 0.4018  |
| 1-oleoyl-GPE (18:1)                          | Lipid                  | Lysophospholipid                                 | 0.73     | 0.1919  | 0.56          | 0.0441  | 1.31          | 0.4357  |
| N-palmitoyl-sphingadienine (d18:2/16:0)*     | Lipid                  | Sphingolipid Metabolism                          | 0.78     | 0.0678  | 0.60          | 0.0006  | 1.31          | 0.0658  |
| sphingomyelin (d17:2/16:0, d18:2/15:0)*      | Lipid                  | Sphingolipid Metabolism                          | 0.81     | 0.2656  | 0.61          | 0.0298  | 1.32          | 0.2629  |
| beta-sitosterol                              | Lipid                  | Sterol                                           | 1.11     | 0.8161  | 2.39          | 0.0407  | 0.46          | 0.0781  |
| Salpha-androstan-3beta,17beta-diol disulfate | Lipid                  | Androgenic Steroids                              | 0.57     | 0.3036  | 0.43          | 0.0480  | 1.32          | 0.3190  |
| glycochenodeoxycholate                       | Lipid                  | Primary Bile Acid Metabolism                     | 1.28     | 0.1500  | 2.17          | 0.0226  | 0.59          | 0.3512  |
| glycochenodeoxycholate sulfate               | Lipid                  | Primary Bile Acid Metabolism                     | 1.05     | 0.1666  | 1.60          | 0.0159  | 0.66          | 0.2617  |
| deoxycholate                                 | Lipid                  | Secondary Bile Acid Metabolism                   | 16.78    | 0.3139  | 17.66         | 0.0208  | 0.95          | 0.1746  |
| glycohyocholate                              | Lipid                  | Secondary Bile Acid Metabolism                   | 1.90     | 0.1058  | 5.66          | 0.0013  | 0.34          | 0.0759  |
| nicotinamide riboside                        | Cofactors and Vitamins | Nicotinate and Nicotinamide Metabolism           | 0.48     | 0.5137  | 0.32          | 0.0480  | 1.51          | 0.1832  |
| dihydrobiopterin                             | Cofactors and Vitamins | Tetrahydrobiopterin Metabolism                   | 0.61     | 0.0621  | 0.56          | 0.0339  | 1.08          | 0.7189  |
